# Supplementary material for: Effects of Jasmonate on Ethylene Function during the Development of Tomato Stamens
Source: PubMed Central journal article supplement (PMC6724093; doi:10.3390/plants8080277), 2019-08-09
Supplement: plants-08-00277-s001.pdf [file plants-08-00277-s001.pdf]

## Supplemental materials

## Supplemental Figures:

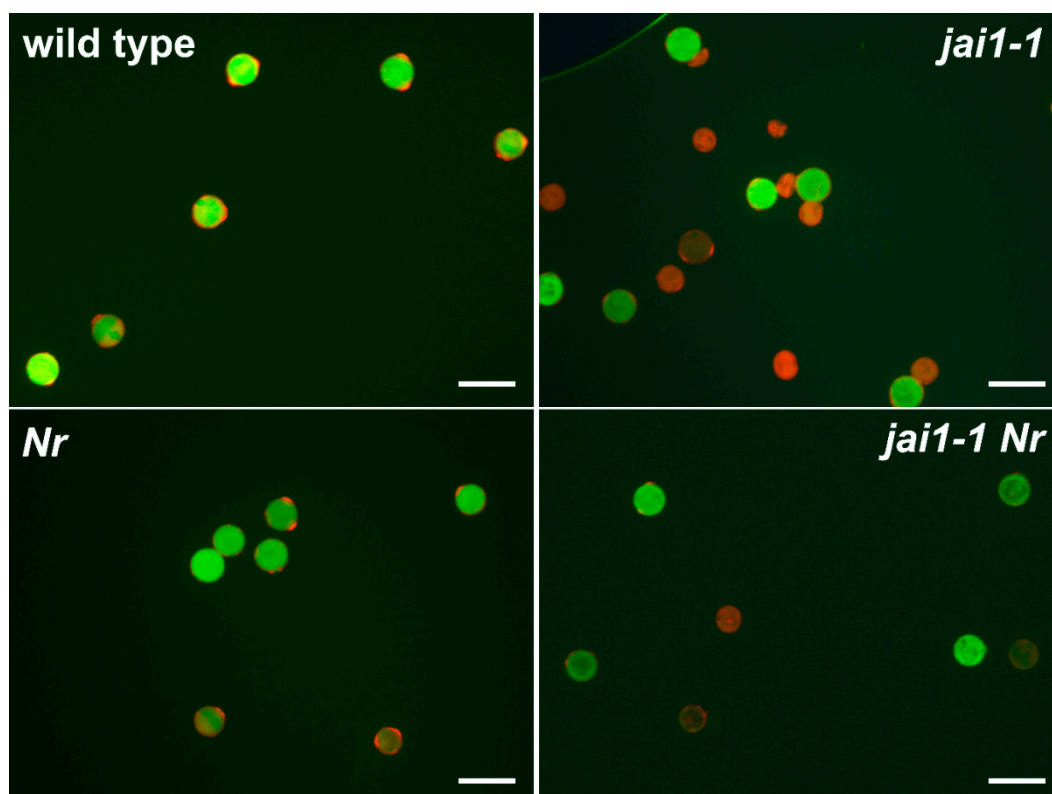

**Figure S1:** Pollen stained with fluorescein-diacetate and propidium iodide to determine their vitality.

Representative micrographs of pollen isolated from open flowers of the respective genotypes. Note that the majority of pollen from wild type and *Nr* exhibit green fluorescence, which is indicative for living cells, whereas a reasonable number of pollen from *jai1-1* and *jai1-1 Nr* shows red fluorescence due to the staining with propidium iodide indicative for dead cells. Bars represent 20  $\mu\text{m}$ .

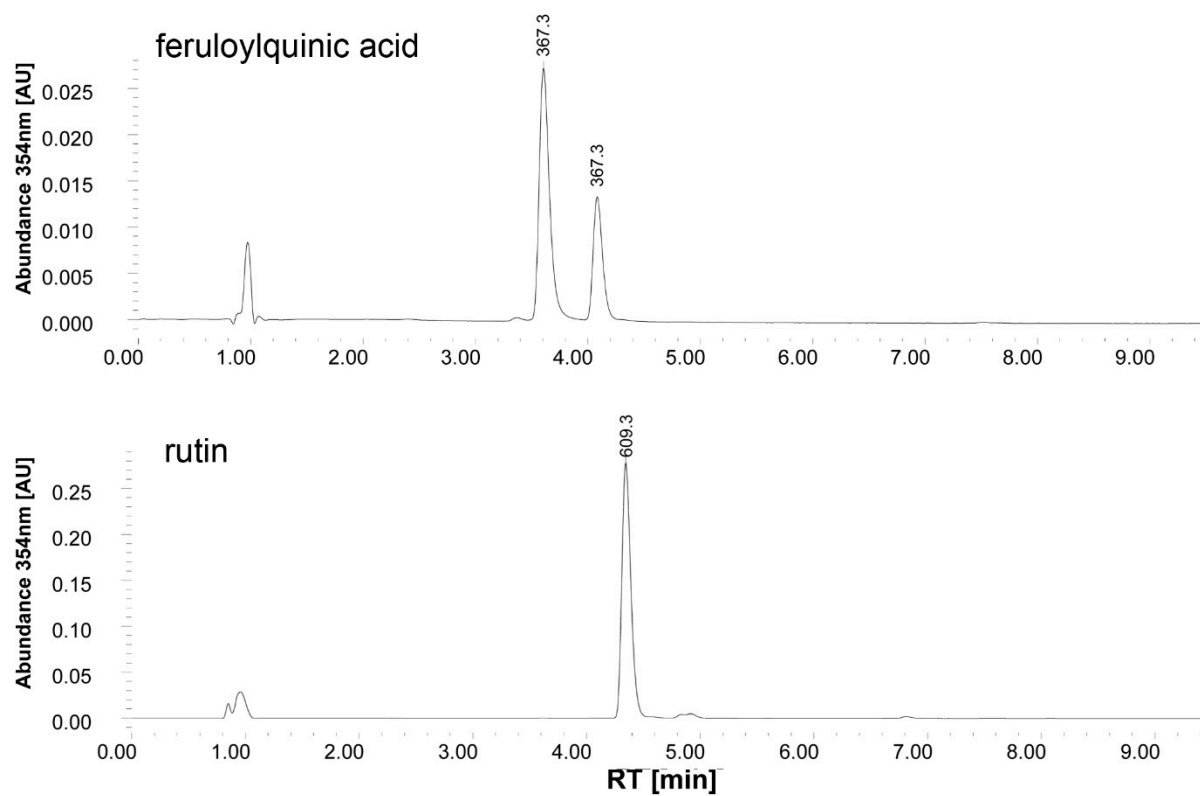

**Figure S2:** LC-MS chromatograms of authentic standards.

Feruloylquinic acid was produced enzymatically using the phenylpropanoid and flavonoid O-methyltransferase (PFOMT) from ice plant Vogt et al. (2004) and resulted in an isomeric product mixture visible by two peaks with identical  $m/z$  ratio.

### Supplemental Tables:

**Table S1:** Relative transcript levels of JA and ET-regulated genes in four developmental stages of stamens from wild type, *Nr*, *jai1-1*, and *jai1-1 Nr*.

All transcript levels were determined by RT-qPCR using Benchmark system (Fluidigm) and set in relation to SITIP41. Mean values  $\pm$  SE are presented. Different letters designate statistically different values (1-factorial ANOVA followed by Tukey's HSD test;  $p \leq 0.05$ ).

| <u>stage 3</u> | wild type                                |          | <i>Nr</i>                               |          | <i>jai1-1</i>                         |          | <i>jai1-1 Nr</i>                      |          |
|----------------|------------------------------------------|----------|-----------------------------------------|----------|---------------------------------------|----------|---------------------------------------|----------|
| ACC-Ox         | 0.4712 $\pm$ 0.2669                      | a        | 0.3928 $\pm$ 0.0597                     | a        | 2.8207 $\pm$ 0.6424                   | a        | 2.9967 $\pm$ 0.2986                   | a        |
| ACC-Ox5        | 0.2524 $\pm$ 0.0391                      | a        | 0.2636 $\pm$ 0.1308                     | a        | 1.5049 $\pm$ 0.2921                   | a        | 1.8506 $\pm$ 0.3273                   | a        |
| ACX1           | 8.7923 $\pm$ 1.3716                      | a        | 7.9017 $\pm$ 1.0758                     | a        | 5.7808 $\pm$ 0.5301                   | a        | 3.9620 $\pm$ 0.7384                   | a        |
| AOX1b          | 0.0020 $\pm$ 0.0008                      | a        | 0.0021 $\pm$ 0.0012                     | a        | 0.0777 $\pm$ 0.0122                   | a        | 0.0293 $\pm$ 0.0052                   | a        |
| bXylo          | 0.5002 $\pm$ 0.1589                      | a        | 0.7065 $\pm$ 0.3863                     | a        | 1.4225 $\pm$ 0.5296                   | a        | 2.5241 $\pm$ 0.3546                   | a        |
| AP2/ERF        | 0.0143 $\pm$ 0.0015                      | a        | 0.0369 $\pm$ 0.0332                     | a        | 0.0976 $\pm$ 0.0797                   | a        | 0.1815 $\pm$ 0.1089                   | a        |
| ETR6           | <b>0.0100 <math>\pm</math> 0.0035</b>    | <b>a</b> | <b>0.0019 <math>\pm</math> 0.0010</b>   | <b>a</b> | <b>0.3510 <math>\pm</math> 0.0785</b> | <b>b</b> | <b>0.1027 <math>\pm</math> 0.0315</b> | <b>b</b> |
| GRAS           | 0.0256 $\pm$ 0.0250                      | a        | 0.0018 $\pm$ 0.0018                     | a        | 0.0002 $\pm$ 0.0002                   | a        | 0.0002 $\pm$ 0.0002                   | a        |
| IAA-aaHy       | <b>4.9023 <math>\pm</math> 0.6273</b>    | <b>a</b> | <b>0.8181 <math>\pm</math> 0.8181</b>   | <b>a</b> | <b>0.0701 <math>\pm</math> 0.0446</b> | <b>b</b> | <b>0.0657 <math>\pm</math> 0.0258</b> | <b>b</b> |
| JAZ2           | 1.6955 $\pm$ 0.4822                      | a        | 0.6412 $\pm$ 0.6412                     | a        | 0.2809 $\pm$ 0.0858                   | a        | 0.1532 $\pm$ 0.1122                   | a        |
| JAZ9           | 0.0280 $\pm$ 0.0155                      | a        | 0.0090 $\pm$ 0.0056                     | a        | 0.0000                                | a        | 0.0000                                | a        |
| LAP            | 18.2448 $\pm$ 16.2373                    | a        | 6.2946 $\pm$ 4.7610                     | a        | 0.0002 $\pm$ 0.0001                   | a        | 0.0002 $\pm$ 0.0002                   | a        |
| Cel1           | 0.2951 $\pm$ 0.1327                      | a        | 0.4673 $\pm$ 0.1104                     | a        | 14.2057 $\pm$ 7.3152                  | a        | 9.6162 $\pm$ 4.3681                   | a        |
| MADS           | 0.5266 $\pm$ 0.0959                      | a        | 0.2604 $\pm$ 0.0464                     | a        | 0.6050 $\pm$ 0.1024                   | a        | 0.6002 $\pm$ 0.0547                   | a        |
| Meta7          | 0.0416 $\pm$ 0.0203                      | a        | 0.0277 $\pm$ 0.0047                     | a        | 0.3369 $\pm$ 0.1545                   | a        | 0.2582 $\pm$ 0.2157                   | a        |
| MPF2           | 0.0005 $\pm$ 0.0003                      | a        | 0.0002 $\pm$ 0.0002                     | a        | 0.1130 $\pm$ 0.0086                   | a        | 0.0393 $\pm$ 0.0140                   | a        |
| MYB21          | 29.1981 $\pm$ 5.8365                     | a        | 15.3240 $\pm$ 8.0706                    | a        | 7.3673 $\pm$ 0.7459                   | a        | 4.9896 $\pm$ 0.5975                   | a        |
| MYBAN2         | 0.0088 $\pm$ 0.0088                      | a        | 0.0000                                  | a        | 0.0003 $\pm$ 0.0002                   | a        | 0.0000                                | a        |
| MYB-like       | 0.0218 $\pm$ 0.0081                      | a        | 0.0233 $\pm$ 0.0112                     | a        | 0.0119 $\pm$ 0.0024                   | a        | 0.0120 $\pm$ 0.0002                   | a        |
| Pirin          | 0.0481 $\pm$ 0.0204                      | a        | 0.0238 $\pm$ 0.0075                     | a        | 0.2439 $\pm$ 0.0386                   | a        | 0.2663 $\pm$ 0.0680                   | a        |
| RIN            | 0.0016 $\pm$ 0.0015                      | a        | 0.0003 $\pm$ 0.0003                     | a        | 0.0942 $\pm$ 0.0433                   | a        | 0.0170 $\pm$ 0.0131                   | a        |
| Subti          | 0.0015 $\pm$ 0.0014                      | a        | 0.0122 $\pm$ 0.0103                     | a        | 0.0039 $\pm$ 0.0015                   | a        | 0.0115 $\pm$ 0.0075                   | a        |
| TD2            | <b>106.2915 <math>\pm</math> 54.4440</b> | <b>a</b> | <b>63.3677 <math>\pm</math> 41.5357</b> | <b>a</b> | <b>0.2753 <math>\pm</math> 0.0236</b> | <b>b</b> | <b>0.2242 <math>\pm</math> 0.0430</b> | <b>b</b> |
| TrypSyn        | <b>1.0661 <math>\pm</math> 0.3713</b>    | <b>a</b> | <b>0.5042 <math>\pm</math> 0.1466</b>   | <b>a</b> | <b>0.0013 <math>\pm</math> 0.0006</b> | <b>b</b> | <b>0.0043 <math>\pm</math> 0.0022</b> | <b>b</b> |
| Xyloglu3       | 0.0680 $\pm$ 0.0078                      | a        | 0.8330 $\pm$ 0.7316                     | a        | 0.3816 $\pm$ 0.2328                   | a        | 0.2128 $\pm$ 0.0972                   | a        |

| <u>stage 4</u> | wild type                             |           | <i>Nr</i>                             |          | <i>jai1-1</i>                         |          | <i>jai1-1 Nr</i>                      |          |
|----------------|---------------------------------------|-----------|---------------------------------------|----------|---------------------------------------|----------|---------------------------------------|----------|
| ACC-Ox         | <b>0.5790 <math>\pm</math> 0.1487</b> | <b>a</b>  | <b>0.3261 <math>\pm</math> 0.0249</b> | <b>a</b> | <b>1.7501 <math>\pm</math> 0.2114</b> | <b>b</b> | <b>2.5540 <math>\pm</math> 0.2974</b> | <b>b</b> |
| ACC-Ox5        | 1.0232 $\pm$ 0.4579                   | a         | 0.0876 $\pm$ 0.0219                   | a        | 0.3344 $\pm$ 0.1542                   | a        | 0.2311 $\pm$ 0.0560                   | a        |
| ACX1           | 12.5988 $\pm$ 1.2091                  | a         | 8.6602 $\pm$ 1.0442                   | a        | 3.3553 $\pm$ 0.5349                   | a        | 3.8885 $\pm$ 0.9098                   | a        |
| AOX1b          | 0.1264 $\pm$ 0.0507                   | a         | 0.0148 $\pm$ 0.0105                   | a        | 0.0164 $\pm$ 0.0086                   | a        | 0.0195 $\pm$ 0.0043                   | a        |
| bXylo          | 0.1852 $\pm$ 0.0281                   | a         | 0.0884 $\pm$ 0.0240                   | a        | 0.1874 $\pm$ 0.0588                   | a        | 0.3600 $\pm$ 0.0235                   | a        |
| AP2/ERF        | <b>0.0562 <math>\pm</math> 0.0562</b> | <b>ab</b> | <b>0.0505 <math>\pm</math> 0.0151</b> | <b>a</b> | <b>0.7321 <math>\pm</math> 0.0970</b> | <b>b</b> | <b>0.6936 <math>\pm</math> 0.0657</b> | <b>b</b> |
| ETR6           | 0.2600 $\pm$ 0.0987                   | a         | 0.0138 $\pm$ 0.0066                   | a        | 0.1020 $\pm$ 0.0442                   | a        | 0.0185 $\pm$ 0.0021                   | a        |
| GRAS           | 0.0002 $\pm$ 0.0001                   | a         | 0.0000                                | a        | 0.0000 $\pm$ 0.0000                   | a        | 0.0000                                | a        |
| IAA-aaHy       | <b>2.0758 <math>\pm</math> 1.4523</b> | <b>a</b>  | <b>4.1320 <math>\pm</math> 0.1704</b> | <b>a</b> | <b>0.0188 <math>\pm</math> 0.0014</b> | <b>b</b> | <b>0.0505 <math>\pm</math> 0.0080</b> | <b>b</b> |
| JAZ2           | 6.2075 $\pm$ 2.1313                   | a         | 1.9820 $\pm$ 0.6015                   | a        | 0.3705 $\pm$ 0.1855                   | a        | 0.9623 $\pm$ 0.2046                   | a        |
| JAZ9           | 0.0036 $\pm$ 0.0021                   | a         | 0.0135 $\pm$ 0.0047                   | a        | 0.0000                                | a        | 0.0001 $\pm$ 0.0001                   | a        |

|          |                          |          |                          |          |                         |          |                         |          |
|----------|--------------------------|----------|--------------------------|----------|-------------------------|----------|-------------------------|----------|
| LAP      | 0.5813 ± 0.0247          | a        | 0.3575 ± 0.1003          | a        | 0.0000                  | a        | 0.0004 ± 0.0004         | a        |
| Cel1     | <b>5.7649 ± 2.5183</b>   | <b>a</b> | <b>0.5008 ± 0.1101</b>   | <b>b</b> | <b>43.7659 ± 9.3487</b> | <b>c</b> | <b>20.2118 ± 3.5641</b> | <b>c</b> |
| MADS     | 1.0425 ± 0.1032          | a        | 0.3703 ± 0.0325          | a        | 0.7739 ± 0.1311         | a        | 0.7415 ± 0.1153         | a        |
| Meta7    | 0.3845 ± 0.2224          | a        | 0.0216 ± 0.0015          | a        | 0.2142 ± 0.0515         | a        | 0.4280 ± 0.1747         | a        |
| MPF2     | 0.0001 ± 0.0001          | a        | 0.0005 ± 0.0002          | a        | 0.0628 ± 0.0158         | a        | 0.0247 ± 0.0046         | a        |
| MYB21    | <b>42.7316 ± 5.0046</b>  | <b>a</b> | <b>36.1562 ± 1.4711</b>  | <b>a</b> | <b>9.6939 ± 2.0089</b>  | <b>b</b> | <b>8.7854 ± 0.1753</b>  | <b>b</b> |
| MYBAN2   | 0.0000                   | a        | 0.0000                   | a        | 0.0002 ± 0.0001         | a        | 0.0000                  | a        |
| MYB-like | 0.0160 ± 0.0087          | a        | 0.0051 ± 0.0004          | a        | 0.0114 ± 0.0022         | a        | 0.0130 ± 0.0018         | a        |
| Pirin    | 0.0859 ± 0.0339          | a        | 0.0167 ± 0.0040          | a        | 0.1004 ± 0.0404         | a        | 0.0514 ± 0.0122         | a        |
| RIN      | 0.0000                   | a        | 0.0001 ± 0.0001          | a        | 0.0365 ± 0.0144         | a        | 0.0660 ± 0.0226         | a        |
| Subti    | 0.0012 ± 0.0010          | a        | 0.0014 ± 0.0004          | a        | 0.0029 ± 0.0009         | a        | 0.0045 ± 0.0024         | a        |
| TD2      | <b>66.6793 ± 13.9023</b> | <b>a</b> | <b>59.1867 ± 13.5608</b> | <b>a</b> | <b>0.1075 ± 0.0146</b>  | <b>b</b> | <b>0.0660 ± 0.0038</b>  | <b>b</b> |
| TrypSyn  | 0.5211 ± 0.4685          | a        | 0.6681 ± 0.1252          | a        | 0.0006 ± 0.0006         | a        | 0.0008 ± 0.0007         | a        |
| Xyloglu3 | 0.2386 ± 0.0241          | a        | 0.1118 ± 0.0562          | a        | 0.8262 ± 0.3004         | a        | 0.7999 ± 0.0415         | a        |

| stage 5  | wild type                |          | Nr                      |          | jai1-1                  |          | jai1-1 Nr               |          |
|----------|--------------------------|----------|-------------------------|----------|-------------------------|----------|-------------------------|----------|
| ACC-Ox   | 1.9981 ± 0.5095          | a        | 1.6077 ± 0.3645         | a        | 1.1837 ± 0.0855         | a        | 1.5942 ± 0.1095         | a        |
| ACC-Ox5  | 0.5168 ± 0.2451          | a        | 0.0450 ± 0.0232         | a        | 0.0264 ± 0.0139         | a        | 0.0300 ± 0.0067         | a        |
| ACX1     | <b>14.4046 ± 3.2464</b>  | <b>a</b> | <b>8.3851 ± 1.0674</b>  | <b>a</b> | <b>3.8525 ± 0.8319</b>  | <b>b</b> | <b>3.1069 ± 0.1571</b>  | <b>b</b> |
| AOX1b    | 0.3221 ± 0.0222          | a        | 0.0888 ± 0.0123         | a        | 0.0166 ± 0.0066         | a        | 0.0032 ± 0.0017         | a        |
| bXylo    | 0.1503 ± 0.0449          | a        | 0.4521 ± 0.0742         | a        | 0.0580 ± 0.0437         | a        | 0.0627 ± 0.0114         | a        |
| AP2/ERF  | 0.6109 ± 0.3968          | a        | 0.4740 ± 0.2376         | a        | 0.8824 ± 0.0897         | a        | 0.8802 ± 0.0247         | a        |
| ETR6     | 0.0503 ± 0.0271          | a        | 0.0096 ± 0.0040         | a        | 0.0678 ± 0.0231         | a        | 0.0054 ± 0.0014         | a        |
| GRAS     | 0.0003 ± 0.0003          | a        | 0.0001 ± 0.0001         | a        | 0.0002 ± 0.0002         | a        | 0.0000                  | a        |
| IAA-aaHy | 0.0535 ± 0.0304          | a        | 0.0088 ± 0.0031         | a        | 0.0131 ± 0.0062         | a        | 0.0081 ± 0.0063         | a        |
| JAZ2     | 9.2644 ± 1.9052          | a        | 28.4300 ± 23.5365       | a        | 0.5977 ± 0.3013         | a        | 0.8518 ± 0.0587         | a        |
| JAZ9     | 0.0003 ± 0.0003          | a        | 0.0000                  | a        | 0.0000                  | a        | 0.0000                  | a        |
| LAP      | 0.2704 ± 0.2193          | a        | 0.0280 ± 0.0105         | a        | 0.0008 ± 0.0004         | a        | 0.0000                  | a        |
| Cel1     | 15.8777 ± 8.1324         | a        | 12.4718 ± 3.4393        | a        | 28.8038 ± 5.4346        | a        | 27.6376 ± 4.5335        | a        |
| MADS     | 0.9732 ± 0.2834          | a        | 0.6556 ± 0.0377         | a        | 0.9217 ± 0.1852         | a        | 0.7008 ± 0.0442         | a        |
| Meta7    | 1.1400 ± 0.5761          | a        | 0.3267 ± 0.0530         | a        | 0.0761 ± 0.0300         | a        | 0.0718 ± 0.0071         | a        |
| MPF2     | 0.0189 ± 0.0185          | a        | 0.0003 ± 0.0003         | a        | 0.0304 ± 0.0014         | a        | 0.0140 ± 0.0028         | a        |
| MYB21    | <b>42.3775 ± 11.1604</b> | <b>a</b> | <b>51.7808 ± 3.8583</b> | <b>a</b> | <b>14.4465 ± 1.6961</b> | <b>b</b> | <b>12.8757 ± 0.4711</b> | <b>b</b> |
| MYBAN2   | 0.0000                   | a        | 0.0002 ± 0.0002         | a        | 0.0002 ± 0.0001         | a        | 0.0000                  | a        |
| MYB-like | 0.0183 ± 0.0060          | a        | 0.0122 ± 0.0034         | a        | 0.0064 ± 0.0028         | a        | 0.0119 ± 0.0008         | a        |
| Pirin    | 0.1416 ± 0.0077          | a        | 0.0260 ± 0.0055         | a        | 0.0505 ± 0.0142         | a        | 0.0366 ± 0.0034         | a        |
| RIN      | <b>0.0000</b>            | <b>a</b> | <b>0.0000</b>           | <b>a</b> | <b>0.0246 ± 0.0095</b>  | <b>b</b> | <b>0.0070 ± 0.0033</b>  | <b>b</b> |
| Subti    | 0.0003 ± 0.0002          | a        | 0.0007 ± 0.0004         | a        | 0.0005 ± 0.0005         | a        | 0.0005 ± 0.0005         | a        |
| TD2      | <b>24.2551 ± 6.9759</b>  | <b>a</b> | <b>27.0128 ± 2.6992</b> | <b>a</b> | <b>0.2575 ± 0.0595</b>  | <b>b</b> | <b>0.1458 ± 0.0090</b>  | <b>b</b> |
| TrypSyn  | 0.0005 ± 0.0002          | a        | 0.0001 ± 0.0000         | a        | 0.0001 ± 0.0001         | a        | 0.0000 ± 0.0000         | a        |
| Xyloglu3 | 0.5471 ± 0.1633          | a        | 0.1062 ± 0.0256         | a        | 0.1055 ± 0.0455         | a        | 0.0914 ± 0.0152         | a        |

| stage 6 | wild type       |   | Nr              |   | jai1-1          |   | jai1-1 Nr       |   |
|---------|-----------------|---|-----------------|---|-----------------|---|-----------------|---|
| ACC-Ox  | 7.2079 ± 1.0903 | a | 3.0021 ± 0.5001 | a | 4.1536 ± 2.2147 | a | 4.2906 ± 1.9331 | a |
| ACC-Ox5 | 0.0174 ± 0.0053 | a | 0.0256 ± 0.0047 | a | 0.0268 ± 0.0145 | a | 0.0392 ± 0.0052 | a |

|          |                        |          |                  |          |                  |          |                 |          |
|----------|------------------------|----------|------------------|----------|------------------|----------|-----------------|----------|
| ACX1     | 7.3001 ± 1.0809        | a        | 5.7879 ± 1.5728  | a        | 3.9358 ± 0.3620  | a        | 4.7079 ± 0.6227 | a        |
| AOX1b    | 0.0375 ± 0.0101        | a        | 0.0317 ± 0.0171  | a        | 0.0531 ± 0.0217  | a        | 0.0236 ± 0.0147 | a        |
| bXylo    | 0.0878 ± 0.0151        | a        | 0.3219 ± 0.1073  | a        | 0.0351 ± 0.0147  | a        | 0.0138 ± 0.0057 | a        |
| AP2/ERF  | 0.2648 ± 0.1399        | a        | 0.6146 ± 0.0656  | a        | 3.2172 ± 1.7817  | a        | 1.2984 ± 0.2549 | a        |
| ETR6     | 0.0213 ± 0.0096        | a        | 0.0023 ± 0.0005  | a        | 0.9121 ± 0.7228  | a        | 0.0167 ± 0.0095 | a        |
| GRAS     | <b>0.0005 ± 0.0002</b> | <b>a</b> | <b>0.0000</b>    | <b>b</b> | <b>0.0000</b>    | <b>b</b> | <b>0.0000</b>   | <b>b</b> |
| IAA-aaHy | 0.0203 ± 0.0053        | a        | 0.0048 ± 0.0008  | a        | 0.0071 ± 0.0051  | a        | 0.0022 ± 0.0017 | a        |
| JAZ2     | 11.6272 ± 2.0629       | a        | 7.1288 ± 3.5678  | a        | 1.1900 ± 0.6067  | a        | 2.9077 ± 0.3890 | a        |
| JAZ9     | 0.0002 ± 0.0002        | a        | 0.0000           | a        | 0.0000           | a        | 0.0000          | a        |
| LAP      | 0.0397 ± 0.0167        | a        | 0.0215 ± 0.0124  | a        | 0.0044 ± 0.0030  | a        | 0.0003 ± 0.0003 | a        |
| Cel1     | 1.2831 ± 0.4853        | a        | 4.1201 ± 0.4031  | a        | 15.9382 ± 8.2183 | a        | 7.8820 ± 4.0619 | a        |
| MADS     | 1.3139 ± 0.0312        | a        | 0.6669 ± 0.0496  | a        | 1.5920 ± 0.1956  | a        | 0.8829 ± 0.1048 | a        |
| Meta7    | 0.0269 ± 0.0133        | a        | 0.1056 ± 0.0450  | a        | 0.0052 ± 0.0013  | a        | 0.0149 ± 0.0080 | a        |
| MPF2     | 0.0008 ± 0.0004        | a        | 0.0005 ± 0.0005  | a        | 0.0120 ± 0.0060  | a        | 0.0124 ± 0.0025 | a        |
| MYB21    | 23.8062 ± 2.5866       | a        | 27.2789 ± 3.8392 | a        | 17.2325 ± 1.6721 | a        | 9.5256 ± 4.7683 | a        |
| MYBAN2   | 0.0012 ± 0.0005        | a        | 0.0000 ± 0.0000  | a        | 0.0509 ± 0.0255  | a        | 0.0018 ± 0.0016 | a        |
| MYB-like | 0.0603 ± 0.0092        | a        | 0.0181 ± 0.0014  | a        | 0.0069 ± 0.0028  | a        | 0.0095 ± 0.0032 | a        |
| Pirin    | 0.0246 ± 0.0090        | a        | 0.0102 ± 0.0026  | a        | 0.3517 ± 0.2101  | a        | 0.2357 ± 0.0803 | a        |
| RIN      | 0.0000                 | a        | 0.0000           | a        | 0.0770 ± 0.0326  | a        | 0.0564 ± 0.0181 | a        |
| Subti    | 0.0015 ± 0.0007        | a        | 0.0009 ± 0.0004  | a        | 0.0040 ± 0.0020  | a        | 0.0005 ± 0.0003 | a        |
| TD2      | 11.5470 ± 2.3231       | a        | 15.5387 ± 2.2769 | a        | 6.8829 ± 5.9233  | a        | 0.7639 ± 0.2330 | a        |
| TrypSyn  | 0.0023 ± 0.0016        | a        | 0.0001 ± 0.0000  | a        | 0.0000 ± 0.0000  | a        | 0.0004 ± 0.0003 | a        |
| Xyloglu3 | 0.1523 ± 0.0407        | a        | 0.1477 ± 0.0376  | a        | 0.4362 ± 0.3254  | a        | 0.1225 ± 0.0454 | a        |

**Table S2:** Primer sequences for Fluidigm-qRT-PCR analysis with JA-regulated genes in stamen.

| Gene (Abbreviation)                                                                        | Sequence [5'->3']                                                              |
|--------------------------------------------------------------------------------------------|--------------------------------------------------------------------------------|
| <i>TIP41</i> (reference gene)<br>( <i>Solyc10g049850</i> )                                 | for_ TCA GTG GGA GGA TTG TAA GG<br>rev_ GGT TCT TTA GAC GCC AAT GC             |
| <i>JAZ2</i><br>( <i>Solyc12g009220</i> )                                                   | for_ CTG ATC AAT CTG GTG TGA GTT TTG<br>rev_ CAG AAG GCT GTG GCA TTG AC        |
| <i>JAZ9</i><br>( <i>Solyc08g036640</i> )                                                   | for_ CAA GTA GAG GAA TGG AGA TG<br>rev_ ATG GTG ATG AAG GCT CAG AC             |
| <i>Leucin aminopeptidase (LAP)</i><br>( <i>Solyc12g010040</i> )                            | for_ CCT GGT AAT GGC GGT GCT ATA A<br>rev_ TCG AGA TGC AAC CAC TGA ACC         |
| <i>Threonin deaminase 2 (TD2)</i><br>( <i>Solyc09g008670</i> )                             | for_ CTT TAT GCC GTT ACC GTA ATC AGG<br>rev_ GGA ATC TGG AAT CCC ATC AAC A     |
| <i>MYB21</i><br>( <i>Solyc02g067760</i> )                                                  | for_ TGC TGG TCT CAA ACG TAC TG<br>rev_ TAG CCA TCG GAG TCT ACA AC             |
| <i>ACX1A</i><br>( <i>Solyc08g078390</i> )                                                  | for_ CAA ATG CTG TAT CAC TGG TTG ATG<br>rev_ CCA TCA TAA CGT CCA AGA ATT GAA C |
| <i>Pirin</i><br>( <i>Solyc09g098160</i> )                                                  | for_ CCT GGA ATG CCT TCC TCT AC<br>rev_ AGA ACC AAA CGC TCC CTC TC             |
| <i>AOX1b</i><br>( <i>Solyc08g075550</i> )                                                  | for_ CGG GAC CTA AAT CAC TTT GC<br>rev_ AAC TCA TGC CCT TGA CAC TG             |
| <i>Metacaspase 7 (Meta7)</i><br>( <i>Solyc10g081300</i> )                                  | for_ AGC CAC TTA AAC AAG ATG AG<br>rev_ TCT TCA TTA GCT TGA CAT CC             |
| <i>Subtilisin-like Protease (Subti)</i><br>( <i>Solyc01g087800</i> )                       | for_ TGA TGG TCT GCC AGA AAT CC<br>rev_ GGG CCT ACA AAT TCC TTT CC             |
| <i>Xyloglucan endotransglucosylase-hydrolase 3 (Xyloglu3)</i><br>( <i>Solyc03g093130</i> ) | for_ CCA AAG AAC CAA CCC ATG AG<br>rev_ AGC CCA ATC ATC AGC ATT CC             |
| <i>Endo-1,4-β-glucanase (Cel1)</i><br>( <i>Solyc08g081620</i> )                            | for_ GGA TGG CCC ATG GCT TAT TC<br>rev_ CAA TAG CAG CCC AAC TCA AC             |
| <i>MADS-Box MPF2-like TF (MPF2)</i><br>( <i>Solyc04g076280</i> )                           | for_ GCC TTT AGT GAC TGA CAT GG<br>rev_ TAG ACT CAG ATG ATT GGC CC             |
| <i>MADS-Box TF (MADS)</i><br>( <i>Solyc04g076700</i> )                                     | for_ GAA CTT GGA GAA CCA ACT GG<br>rev_ TTC TTA CAC GAA CAC CAC GG             |
| <i>ACC-Oxidase 5 (ACC-Ox5)</i><br>( <i>Solyc07g026650</i> )                                | for_ GGA CAA TGT GAA GCA GTT CG<br>rev_ GCT TCT TCA TGT TGG CTT CG             |
| <i>IAA-aminoacid-hydrolase (IAA-aaHy)</i><br>( <i>Solyc05g006220</i> )                     | for_ ATA GTT GCA TCT AGG GCT GG<br>rev_ TGT GGT ATA GCA GCA TGT CC             |
| <i>Tryptophan-Synthase (TrypSyn)</i><br>( <i>Solyc10g005320</i> )                          | for_ GAC TAG GAA ACA AGC CAT GG<br>rev_ AAC ACA TGT GGT TTG CCA CC             |
| <i>ACC-Oxidase (ACC-Ox)</i><br>( <i>Solyc02g036350</i> )                                   | for_ TCA GTG GTC TCC AAC TAC TC<br>rev_ GCA TCG GTG GAA CAT CAA TC             |
| <i>RIN MADS-Box TF (RIN)</i><br>( <i>Solyc05g012020</i> )                                  | for_ CAA ACA TCA TGG CAT TGT GG<br>rev_ ATG AGA AGG CTG TTC ATG TC             |
| <i>ETR6</i><br>( <i>Solyc09g089610</i> )                                                   | for_ GCT GCA GTG GTT GAA GAA TC<br>rev_ TTC TGT TCC GTC AAC CTG TC             |
| <i>AP2/ERF TF</i><br>( <i>Solyc04g071770</i> )                                             | for_ CTT CTT TCA GCC ACA AAC TC<br>rev_ GCT GTT GCT ACT GCT ATT GC             |
| <i>MYB-like TF</i><br>( <i>Solyc05g052610</i> )                                            | for_ GAC GAG ACT ACA CCA AAT CG<br>rev_ CAA GAA CTG ATT TCC CAG GG             |
| <i>MYB-TF AN2 (MYBAN2)</i><br>( <i>Solyc10g086250</i> )                                    | for_ CAT CTT GTT CCT GCT AGA GC<br>rev_ CTG CAA CTC TTT CGA CAT CG             |
| <i>GRAS-family TF (GRAS)</i><br>( <i>Solyc02g092570</i> )                                  | for_ TGC TAG TAG ATG AAG ACG CG<br>rev_ CCG ATC TTA ATC TGC ACA CC             |
